# Supplementary material
Source: Springer Nature journal article supplement (https://www.springermedizin.de/resource/supplementary/13014_2011_533_MOESM5_ESM.pdf/9634054)

**A**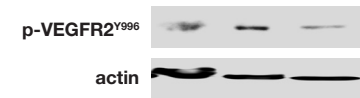

|                |   |   |   |
|----------------|---|---|---|
| IR-CM:         | - | + | + |
| VEGF Antibody: | - | - | + |

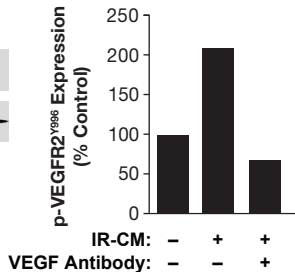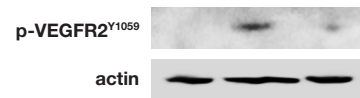

|                |   |   |   |
|----------------|---|---|---|
| IR-CM:         | - | + | + |
| VEGF Antibody: | - | - | + |

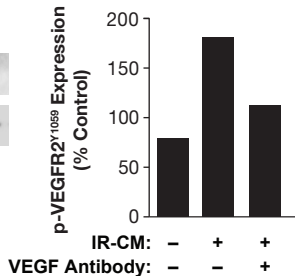**B**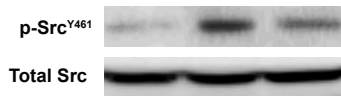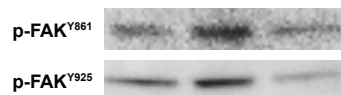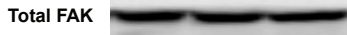

|                |   |   |   |
|----------------|---|---|---|
| IR-CM:         | - | + | + |
| VEGF Antibody: | - | - | + |

Supplement: MOESM5 [file 9634054]
